# Supplementary material for: Nanocarrier-Loaded Imidaclothiz Promotes Plant Uptake and Decreases Pesticide Residue
Source: MDPI journal article supplement (doi:10.3390/ijms23126651), 2022-06-14
Supplement: s1 [file s1]

## Supporting Information

### **Nanocarrier-Loaded Imidaclothiz Promotes Plant Uptake and Decreases Pesticide Residue**

Qinhong Jiang<sup>1</sup>, Min Peng<sup>2</sup>, Meizhen Yin<sup>2</sup>, Jie Shen<sup>1,\*</sup> and Shuo Yan<sup>1,\*</sup>

<sup>1</sup> Department of Plant Biosecurity and MARA Key Laboratory of Surveillance and Management for Plant Quarantine Pests, College of Plant Protection, China Agricultural University, Beijing, China; J.yucheng@outlook.com (Q.J.)

<sup>2</sup> State Key Laboratory of Chemical Resource Engineering, Beijing Lab of Biomedical Materials, Beijing University of Chemical Technology, Beijing, China; 2020400119@buct.edu.cn (M.P.); yinmz@mail.buct.edu.cn (M.Y.)

\* Correspondence: shenjie@cau.edu.cn (J.S.); yanshuo2011@foxmail.com (S.Y.)

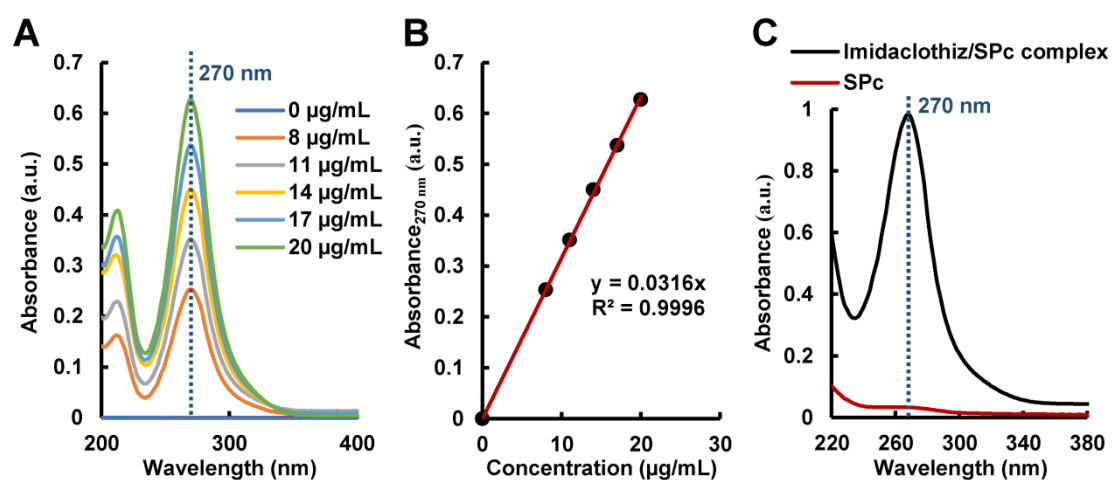

**Figure S1.** Loading capacity of SPc toward imidaclothiz. (A) Absorbance spectra of imidaclothiz with various concentrations. (B) Standard calibration curve of imidaclothiz. (C) Absorbance spectra of imidaclothiz/SPc complex and SPc.

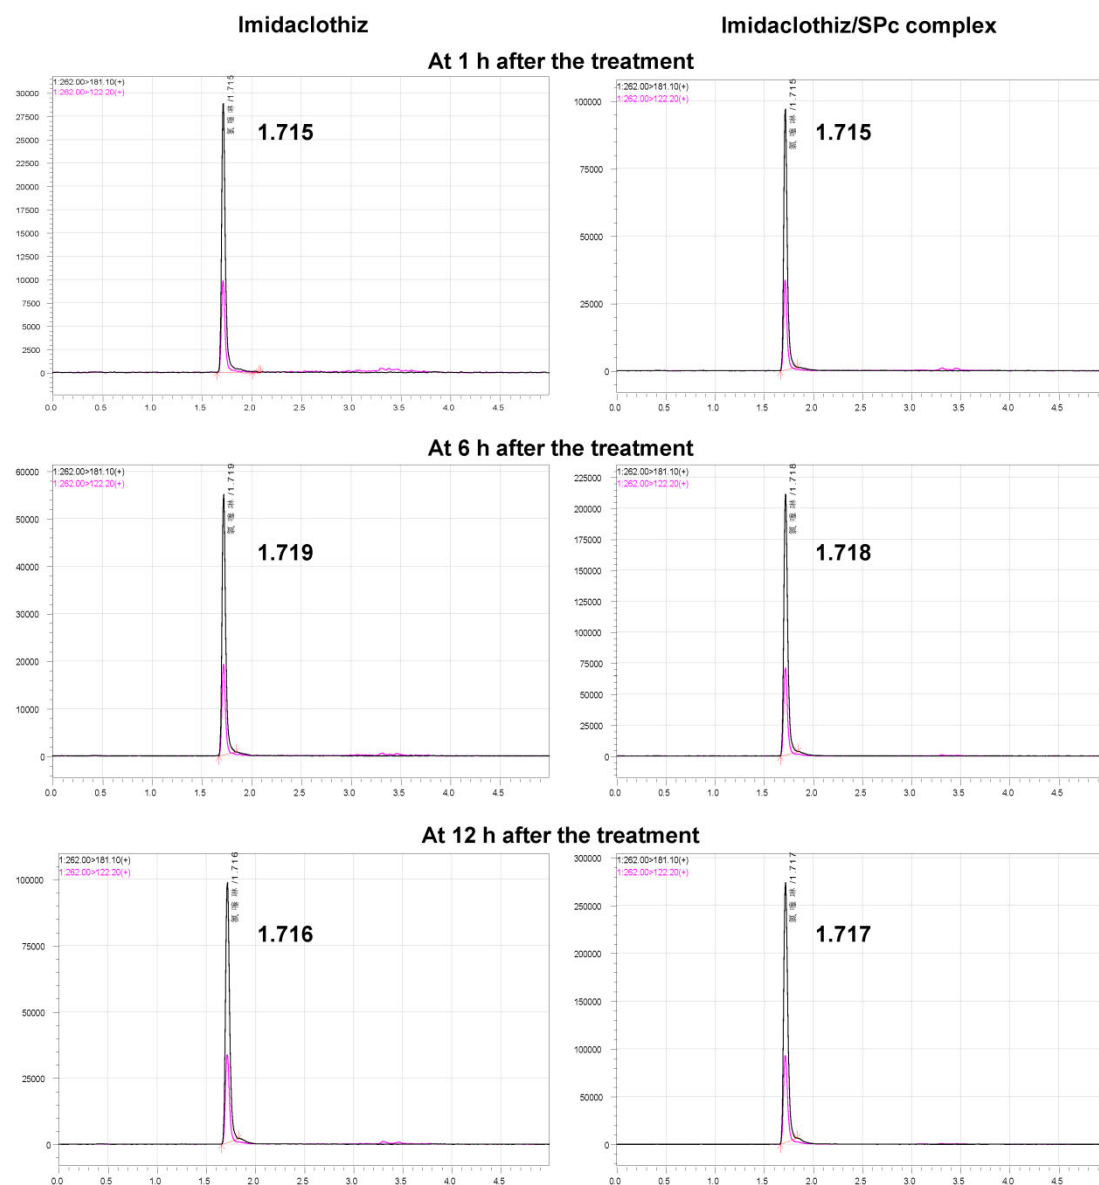

**Figure S2.** Original spectra of liquid chromatography-tandem mass spectrometry data for determining the plant uptake of imidaclothiz by tobacco plants.

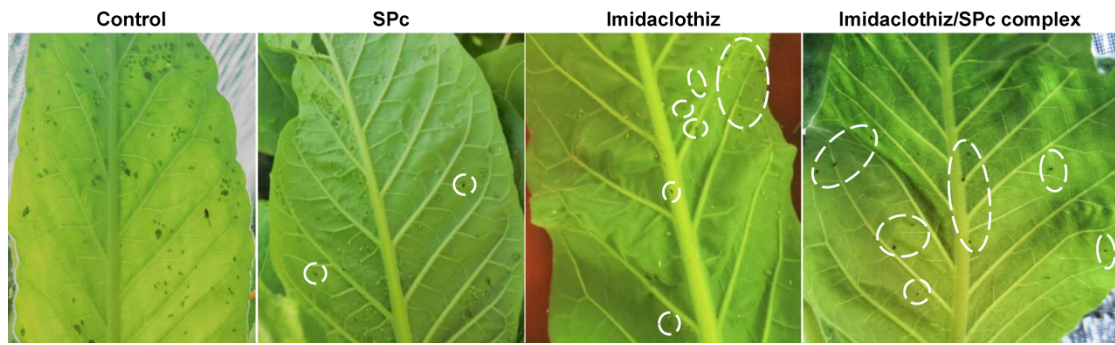

**Figure S3.** Photos of lethal phenotype in various treatments. White circles indicate the dead aphids.

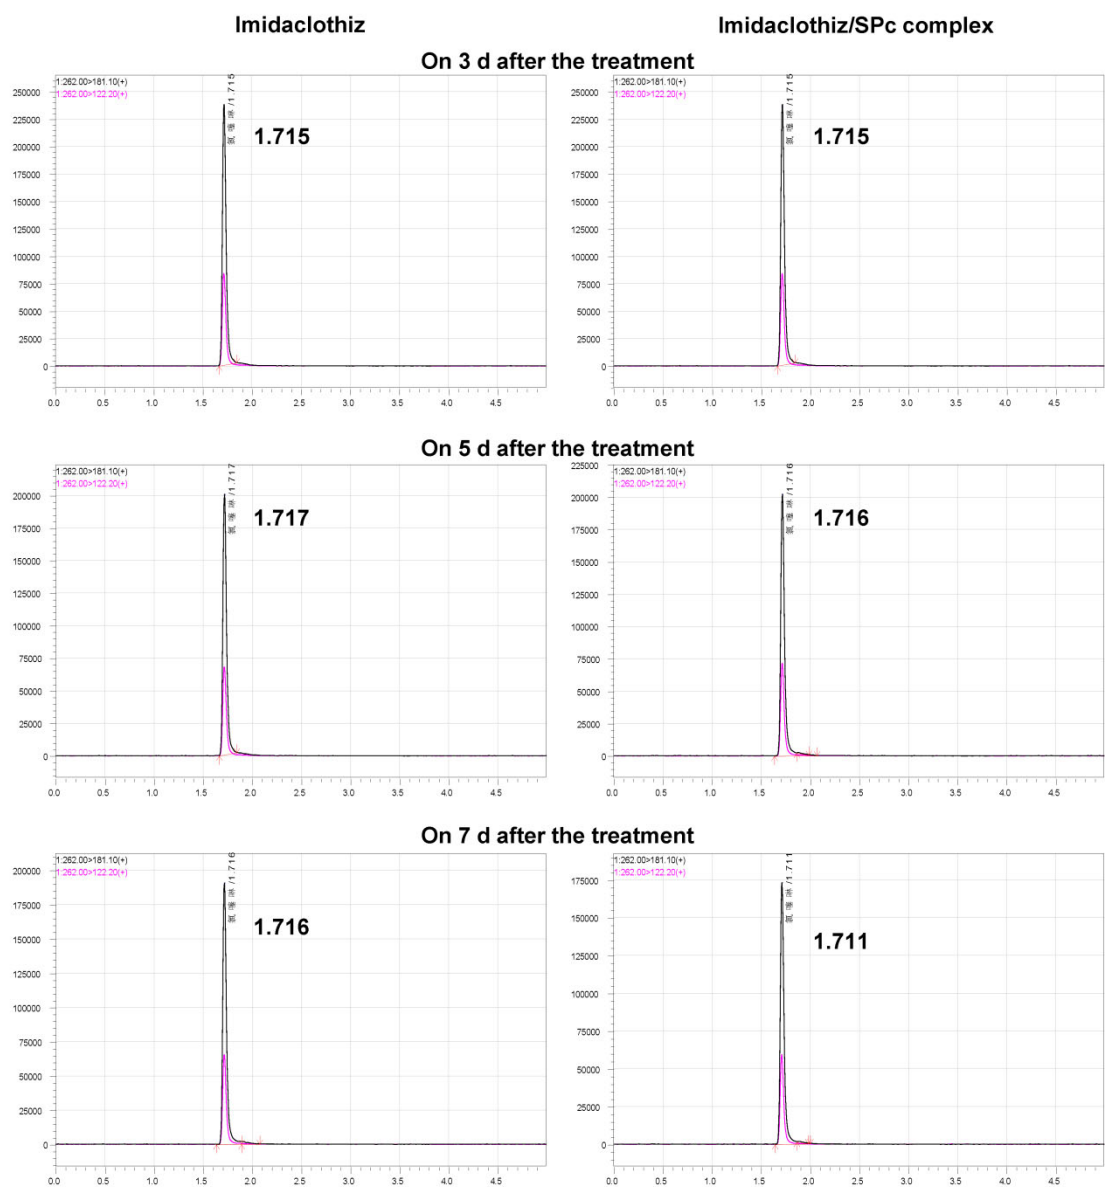

**Figure S4.** Original spectra of liquid chromatography-tandem mass spectrometry data for determining the imidaclothiz residue in tobacco plants.

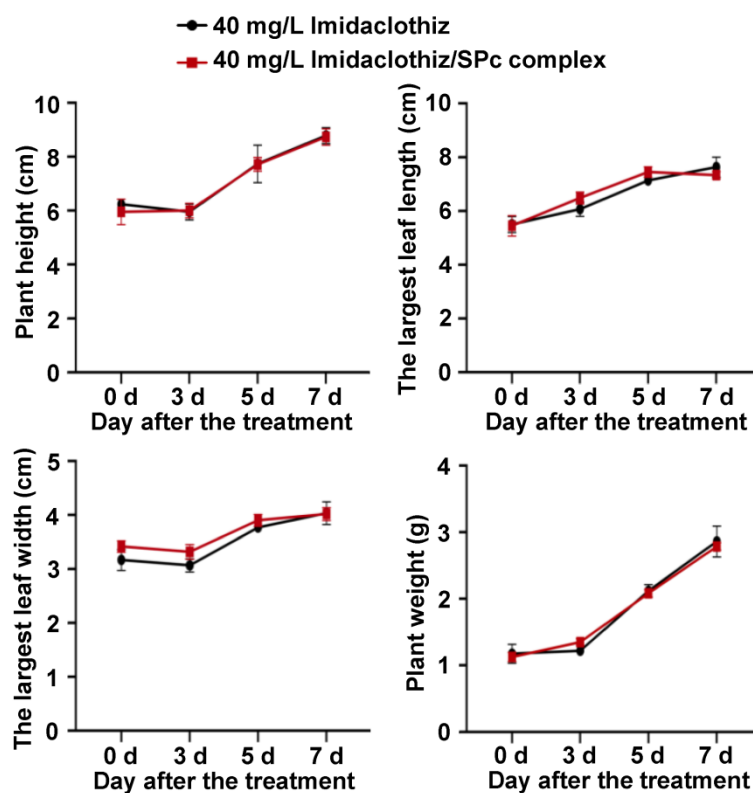

**Figure S5.** Effects of imidaclothiz/SPc complex on the agronomic traits of tobacco plants. Six plants were selected as 6 replicates to record the data.
